# Supplementary material
Source: PubMed Central journal article supplement (PMC5717198)
Supplement: AEM.01685-17_zam024178198s1.pdf [file AEM.01685-17_zam024178198s1.pdf]

Table S1. *perR* mutations identified in the spontaneous OX<sup>R</sup> mutants from *C. jejuni* 11168 P<sub>katA-cat</sub> and CMT P<sub>katA-cat</sub> isolates

| 11168 P <sub>katA-cat</sub> |            | CMT P <sub>katA-cat</sub> |            |
|-----------------------------|------------|---------------------------|------------|
| Mutation*                   | AA change  | Mutation*                 | AA change  |
| +A (120-121)                | Frameshift | C380A                     | 127Ala→Asp |
| -T (209)                    | Frameshift | G115T                     | 39Glu→TAA  |
| -AT (251-252)               | Frameshift | G337T                     | 113Glu→TAA |
| -A (338)                    | Frameshift | G286T                     | 96Glu→TAA  |
| -A (338)                    | Frameshift | G337T                     | 113Glu→TAG |
| -A (36)                     | Frameshift | G328T                     | 110Glu→TAG |
| -A (36)                     | Frameshift | G286T                     | 96Glu→TAA  |
| -G (33)                     | Frameshift | C137A                     | 46Ser→TAA  |
| -G (33)                     | Frameshift | C137A                     | 46Ser→TAA  |
| -A (39)                     | Frameshift | G296T                     | 99Ser→Ile  |
| G275A                       | 92Cys→Tyr  | G286T                     | 96Glu→TAA  |
| +T (123-124)                | Frameshift | G244T                     | 82Glu→TAA  |
| +T (240-241)                | Frameshift | C396A                     | 132Cys→TGA |
| +T (240-241)                | Frameshift | G266T                     | 89Cys →Phe |
| +A (344-345)                | Frameshift | G337T                     | 113Glu→TAA |
|                             |            | G244T                     | 82Glu→TAA  |

\*The numbers are in relative to the first nucleotide sequence of the *perR* gene or the first amino acid in the PerR protein. "+" or "-" in front of a nucleotide indicates either a base insertion or a deletion.

Table S2 PCR primers used in this study

| Primers   | Sequences                                            | PCR products or purposes                         |
|-----------|------------------------------------------------------|--------------------------------------------------|
| cat-F     | TGGAGCGGACAACGAGTAAA                                 | <i>cat</i> gene                                  |
| cat-R     | TCAGTGCGACAAACTGGGATT                                |                                                  |
| mutY-5F   | TCGGGTTTTAGCGTATTGCT                                 | <i>mutY</i> -5' fragment                         |
| mutY-5R   | TTTACTCGTTGTCCGCTCCAAGCCCCAACTTATCCACG               |                                                  |
| mutY-3F   | AATCCCAGTTTGTGCGCACTGAATTTGCGATACAGAAAAGCCAA         | <i>mutY</i> -3' fragment                         |
| mutY-3R   | GCTGTTTTTGGAGGATCTGC                                 |                                                  |
| mutY-cF   | GTTGGATCACCTCCTTTACTTCTCCGCTACAAAAAT                 | <i>mutY</i> gene for chromosomal complementation |
| mutY-cR   | AGACTTATTACTTTGTACTATGCTGTTTTTGGAGGATCT              |                                                  |
| perR-5F   | CAAGTGATCCATGATTGTGC                                 | <i>perR</i> -5' fragment                         |
| perR-5R   | TTTACTCGTTGTCCGCTCCACACATAGTCTTTGCCGAGTA             |                                                  |
| perR-3F   | AATCCCAGTTTGTGCGCACTGAATGTTGTTTGCACCAAATGT           | <i>perR</i> -3' fragment                         |
| perR-3R   | TCGCATAAACTTTGCTTATCT                                |                                                  |
| perR-cF   | AGACTTATTACTTTGTACTTGAAAATGTTAAAATTGGC               | <i>perR</i> gene for chromosomal complementation |
| perR-cR   | GTTGGATCACCTCCTTTTCTCTAAAAGAGTGCAATCAG               |                                                  |
| pRRK-IF   | AGTACAAAGTAATAAGTCTCACAACTATTACTTCA                  | For linearization of the pRRK plasmid            |
| pRRK-IR   | AAAGGAGGTGATCCAACCGC                                 |                                                  |
| pRRK-seqF | GAATCAGCGACTGGGGTG                                   | For sequencing of inserts in the pRRK plasmid    |
| pRRK-seqR | AAGCGCGCTGCCTAT                                      |                                                  |
| perR-rF   | AGGTTATGGACAAGGTGTGG                                 | A 949 bp fragment, see experimental procedures   |
| perR-rR   | TTTACTCGTTGTCCGCTCCAAGAGTGCAATCAGATAGTAAAAAG         |                                                  |
| 0323-rF   | AATCCCAGTTTGTGCGCACTGAGAAGGCGATTGCAAAGATAGGT         | A 802 bp fragment, see experimental procedures   |
| 0323-rR   | TGAACTCACGCCAAAAGCTAA                                |                                                  |
| perR-HisF | CACCATCACCATCACGGATCCGAATTACTACAAATGCTTAAAAAAC       | <i>perR</i> gene for cloning into pQE-30 plasmid |
| perR-HisR | CCAAGCTCAGCTAATTAAGCTTTTAAAATATATGGGTTATTTTAAACC     |                                                  |
| perR-rtF  | TCAATCTCTTTAGCGACGGTTT                               | qRT-PCR amplicon of <i>perR</i> gene             |
| perR-rtR  | CACATTTGGTGCAAAACAACA                                |                                                  |
| katA-rtF  | GAACGCGATGTGAGAGGTTT                                 | qRT-PCR amplicon of <i>katA</i> gene             |
| katA-rtR  | CGGATGAAGAATGTCGGAGT                                 |                                                  |
| ahpC-rtF  | TTCGTTCTTGCTTGATGCTG                                 | qRT-PCR amplicon of <i>ahpC</i> gene             |
| ahpC-rtR  | TTCATCGCCCTTATTCCATC                                 |                                                  |
| catORF-F  | AGACTTATTACTTTGTACTAAATTCTCCTTTGTGATTTTAAAATATATTTTG | <i>cat</i> gene sequence without promoter        |
| catORF-R  | GAATTGCATTGTTTTCTCCTAAATAATAAATTTTATTAATTAG          |                                                  |
| PkatA-F   | GAGAAAACAATGCAATTCACAAAGATTG                         | Promoter sequence of <i>katA</i> gene            |
| PkatA-R   | GTTGGATCACCTCCTTTTATTTATTCAGCAAGTCTTGTAATTC          |                                                  |
| ahpC-seqF | ACGCATTTGTTGCATAGAC                                  | A 1069 bp ahpC gene sequencing product           |
| ahpC-seqR | TCTTCGCCTGCCATATTTTA                                 |                                                  |
| katA-seqF | TCACAATACACACAACCTTACAC                              | A 1987 bp katA gene sequencing product           |
| katA-seqR | TTCTTGCAAAATTTAAAAGCCA                               |                                                  |
| katA-seqM | GGAATTTATAAGCATCGCGG                                 |                                                  |
| perR-seqF | ATGGAAAAACAAGTGAGGTG                                 | A 757 bp perR gene sequencing product            |
| perR-seqR | CACTATGATTTGAAGTATTTGAGT                             |                                                  |
| sodB-seqF | AAGCACCTAGTAATGCTGAG                                 | A 996 bp sodB gene sequencing product            |
| sodB-seqR | CCATTCTAGCACAAAAAGGATT                               |                                                  |
| fur-seqF  | TTTTTGTGTAGCAAGAATCG                                 | A 852 bp fur gene sequencing product             |
| fur-seqR  | CAACAACAGCATTGACACTT                                 |                                                  |

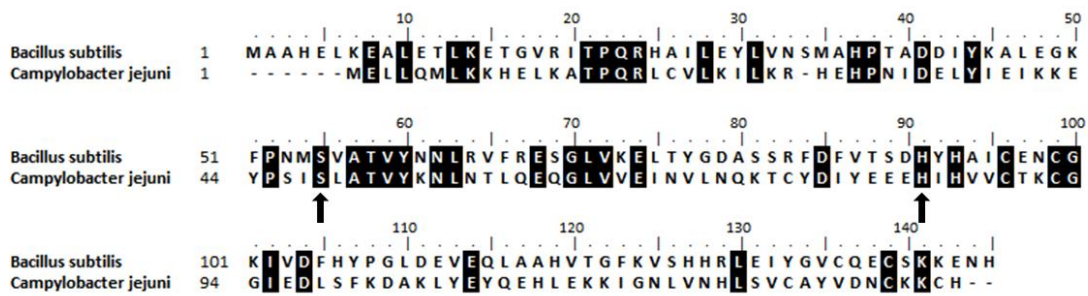

Fig. S1. Alignment of PerR amino acid sequences between *Bacillus subtilis* and *C. jejuni*. The bacterial species are indicated on the left. The solid arrows represent the 48Ser and 84His that are mutated sites of two *C. jejuni* spontaneous OX<sup>R</sup> mutants

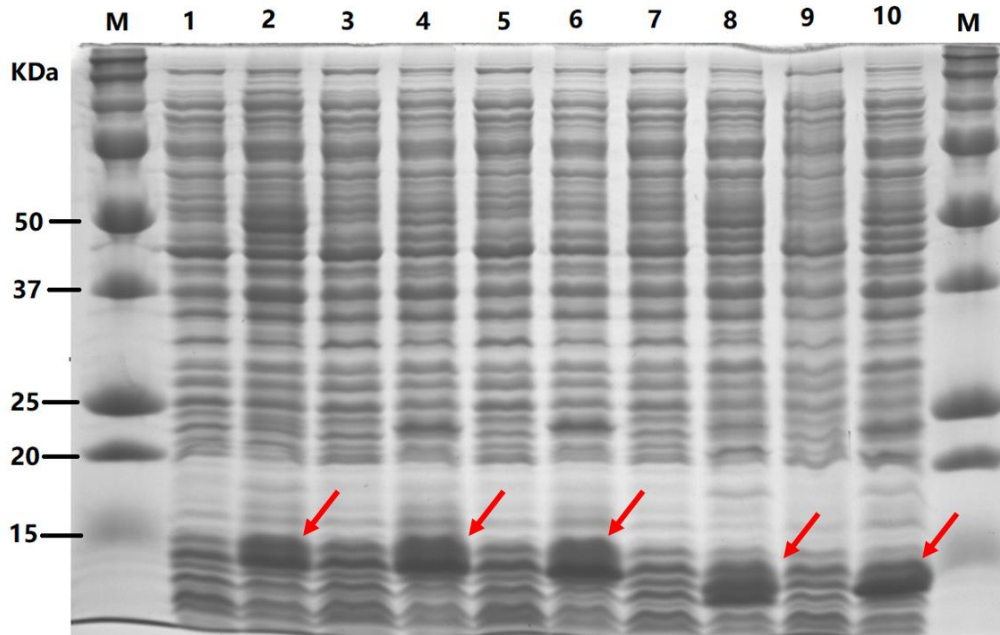

Fig. S2. SDS-PAGE analysis of rPerR produced in *E. coli*. Lane M, prestained molecular mass markers (Bio-Rad); Lanes 1, 3, 5, 7, and 9, whole-cell lysates of *E. coli* constructs expressing PerR of 11168, CMT *perR*<sub>C250A</sub>, CMT *perR*<sub>C143A</sub>, CMT *perR*<sub>G319T</sub>, and 11168 *perR*<sub>A338Del</sub>, respectively, before induction; Lanes 2, 4, 6, 8, and 10, whole-cell lysates of *E. coli* constructs expressing PerR of 11168, CMT *perR*<sub>C250A</sub>, CMT *perR*<sub>C143A</sub>, CMT *perR*<sub>G319T</sub>, and 11168 *perR*<sub>A338Del</sub>, respectively, after induction with 1 mM isopropyl- $\beta$ -D-thiogalactopyranoside (IPTG). Red arrows indicate the locations of rPerR proteins expressed in different *E. coli* isolates
